# Supplementary material
Source: PubMed Central journal article supplement (PMC7414323)
Supplement: mmc1.pdf [file mmc1.pdf]

# ER Prep Project Survey for R1 students

\* Required

1. How helpful do you find this current ER Prep Project? \*

Mark only one oval.

1    2    3    4    5

---

Not helpful                  Very helpful

---

2. Compared to two weeks ago prior to the start of this project, how prepared do you feel for ER call? \*

Mark only one oval.

- Less prepared  
 More prepared  
 The same

3. Feel free to elaborate on the last question:

---

---

---

---

---

4. What type of readout/feedback would you prefer? \*

Mark only one oval.

- Individual email  
 Individual Zoom or Google Hangout readout with screen sharing  
 Small group (2-3 people) Zoom or Google Hangout readout with screen sharing  
 Once a day entire class Zoom or Google Hangout readout with screen sharing

5. How is the caseload per day? \*

Mark only one oval.

- Too much  
 Too little  
 Just right

6. How long does usually take to prelim the cases? \*

Mark only one oval.

- Less than 2 hours  
 Between 2 and 4 hours  
 More than 4 hours

7. For which sub-specialty would you like to see more cases from? Pick as many as you like

Check all that apply.

- Chest  
 Trauma  
 Peds  
 MSK  
 Neuro  
 GI  
 GU  
 Reproductive Imaging

8. How helpful are the seniors/attending prelims and short notes (separate from the personalized feedback)? \*

Mark only one oval.

1    2    3    4    5

---

Not helpful      Very helpful

---

9. Would you like this project to continue in the future in some fashion even after we return to work? \*

Mark only one oval.

Yes  
 No

10. Would you like the core ideas/teaching method of this project to be extrapolated to other areas of your training? (i.e. collections of MSK cases or Neuro cases) \*

Mark only one oval.

Yes  
 No

11. What additional study resources have you been using during this period? \*

---

---

---

---

---

12. What concerns do you have about your radiology education going forward that are not being addressed by this project? \*

---

---

---

---

---

13. As for Pacsbin, do you have any feedback for improving this software?

---

---

---

---

---

14. Any other feedback or ideas for improvement?

---

---

---

---

---
