# Supplementary material
Source: PubMed Central journal article supplement (PMC7414323)
Supplement: mmc2.pdf [file mmc2.pdf]

# ER Prep Project Survey for Senior Teachers

1. How accurately do you feel the selected cases in the Rad Classroom ER Unknown Case project simulate encountered pathology in the Emergency Room?

Mark only one oval.

1    2    3    4    5

---

Not at all accurate      Very accurate

---

2. How efficient is the workflow for this project?

Mark only one oval.

1    2    3    4    5

---

Not at all efficient      Very efficient

---

3. How much has this project prompted your own self-directed learning?

Mark only one oval.

1    2    3    4    5

---

Not at all      Very much

---

4. If the project has prompted your own self-directed learning, please explain in what ways:

---

---

---

---

---

5. How is the caseload per day for you as an instructor?

Mark only one oval.

- Too little
- Just right
- Too much

6. How much time are you spending in total on this project per day?

Mark only one oval.

- less than 2 hours
- 2 - 4 hours
- greater than 4 hours

7. What type of readout/feedback do you prefer to give?

Mark only one oval.

- Individual email
- Individual Zoom or Google Hangout with screen sharing
- Small group (2-3 people) Zoom or Google Hangout readout with screen sharing
- Once a day entire class Zoom or Google Hangout readout with screen sharing

8. Would you like this project to continue in the future in some fashion even after we return to work?

*Mark only one oval.*

- Yes
- No

9. Prior to beginning this project, what was your level of interest in pursuing a future teaching role and/or position in academic radiology?

*Mark only one oval.*

- Extremely uninterested
- Uninterested
- Neither interested nor uninterested
- Interested
- Extremely interested

10. What is your current level of interest in pursuing a future teaching role and/or position in academic radiology?

*Mark only one oval.*

- Extremely uninterested
- Uninterested
- Neither interested nor uninterested
- Interested
- Extremely interested

11. Compared to traditional didactic lecture, how does this project compare?

*Mark only one oval.*

- This project is less helpful to learning than traditional didactic lecture
- This project is a supplement to traditional didactic lecture
- This project is more helpful than traditional didactic lecture

12. What do you feel are the strongest parts of this project?

---

---

---

---

---

13. What feedback do you have for improvement?

---

---

---

---

---
