# Supplementary material
Source: PubMed Central journal article supplement (PMC7414323)
Supplement: mmc3.pdf [file mmc3.pdf]

# ER Prep Project Survey for Attending Teachers

1. How accurately do you feel the selected cases simulate encountered pathology in the Emergency Room?

Mark only one oval.

1      2      3      4      5

---

Not at all accurate                  Very accurate

---

2. How efficient is the workflow for this project?

Mark only one oval.

1      2      3      4      5

---

Not at all efficient                  Very efficient

---

3. How easy or difficult was it to learn the technology involved in this project (ex. Pacsbin, Google Classroom, Google documents)?

Mark only one oval.

Very easy  
 Somewhat easy  
 Neutral  
 Somewhat difficult  
 Very difficult

4. How is the caseload per day for you as an instructor?

Mark only one oval.

Too little  
 Just right  
 Too much

5. How much time are you spending in total on this project per day?

Mark only one oval.

less than 2 hours  
 2 -4 hours  
 greater than 4 hours

6. Compared to traditional didactic lecture, how does this project compare?

Mark only one oval.

This project is less helpful to learning than traditional didactic lecture  
 This project is a supplement to traditional didactic lecture  
 This project is more helpful than traditional didactic lecture

7. What do you feel are the strongest parts of this project?

---

---

---

---

---

8. What feedback do you have for improvement?

---

---

---

---

---
